# Supplementary material for: Oocyte Quality Assessment in Breast Cancer: Implications for Fertility Preservation
Source: MDPI journal article supplement (doi:10.3390/cancers14225718), 2022-11-21
Supplement: s1 [file s1]

# Oocytes quality assessment in breast cancer: implications for fertility preservation

Cristina Fabiani, Antonella Guarin, Caterina Meneghini, Emanuele Licata, Gemma Paciotti, Donatella Miriello, Michele Carlo Schiavi, Vincenzo Spina, Roberta Corno, Mariagrazia Gallo and Rocco Rago

**Table S1.** Variables impact on oocyte quality: uni and multivariable logistic regression according to the presence of dysmorphic oocytes in the control group.

| Characteristic             | Patients at risk | N° of events | Univariable         |         | Multivariable *     |              |
|----------------------------|------------------|--------------|---------------------|---------|---------------------|--------------|
|                            |                  |              | Odds Ratio (95% CI) | p value | Odds Ratio (95% CI) | p value      |
| Age                        |                  |              |                     |         |                     |              |
| Continuos                  | 189              | 61           | 0.96 (0.88-1.05)    | 0.388   | 0.93 (0.82-1.05)    | 0.252        |
| ≤ 34 years                 | 96               | 35           | 1 (Ref)             |         | NI                  | -            |
| >34 years                  | 93               | 26           | 0.68 (0.37-1.25)    | 0.212   |                     |              |
| BMI                        | 165              | 56           | 1.03 (0.95-1.13)    | 0.467   | 1.01 (0.91-1.12)    | 0.814        |
| AMH                        | 157              | 50           | 1.02 (0.88-1.18)    | 0.781   | 1.01 (0.86-1.19)    | 0.859        |
| Duration of stimulation    | 187              | 59           | 1.29 (1.06-1.59)    | 0.013   | 1.38 (1.06-1.79)    | <b>0.017</b> |
| E2 level at triggering day | 188              | 61           | 0.99 (0.99-1.01)    | 0.034   | 0.99 (0.99-1.01)    | <b>0.033</b> |
| Total FSH cumulative dose  | 187              | 61           | 0.99 (0.99-1.01)    | 0.784   | 0.99 (0.99-1.01)    | 0.646        |

Bold font highlights statistically significant difference. CI: Confidence Interval. NI: Not included. BMI: Body Mass Index; AMH: Anti-Mullerian Hormone. E2: Estradiol. FSH: Follicle Stimulating Hormone. \* 135 patients at risk and 43 events. The variable age was included in the multivariable analysis as continuous variable; similar results were obtained using categorized age (data not shown).

**Table S2.** Variables impact on oocyte quality: uni and multivariable linear regression according to the number of dysmorphic oocytes.

| Characteristic             | Patients at risk | Univariable analysis |       |          | Multivariable analysis |       |          |
|----------------------------|------------------|----------------------|-------|----------|------------------------|-------|----------|
|                            |                  | Coefficient (SE)     | t     | p value  | Coefficient (SE)       | t     | p value  |
| Breast cancer              | 294              | 0.94 (0.21)          | 4.47  | < 0.0001 | 1.15 (0.29)            | 4.02  | < 0.0001 |
| Age                        | 294              | -0.08 (0.03)         | -2.70 | 0.007    | -0.05 (0.03)           | -1.57 | 0.117    |
| BMI                        | 270              | 0.01 (0.03)          | 0.36  | 0.722    | 0.00 (0.03)            | -0.03 | 0.978    |
| AMH                        | 248              | 0.10 (0.05)          | 2.15  | 0.033    | 0.08 (0.05)            | 1.58  | 0.116    |
| Duration of stimulation    | 292              | -0.05 (0.05)         | -0.90 | 0.371    | 0.01 (0.06)            | 0.20  | 0.845    |
| E2 level at triggering day | 292              | 0 (0)                | 0.93  | 0.354    | 0 (0)                  | 2.13  | 0.034    |
| Total FSH cumulative dose  | 292              | 0 (0)                | 1.15  | 0.250    | 0 (0)                  | -0.24 | 0.808    |

Bold font highlights statistically significant difference. SE: Standard Error. BMI: Body Mass Index. AMH: Anti-Mullerian Hormone. E2: Estradiol. FSH: Follicle Stimulating Hormone.

**Table S3.** Variables impact on oocyte quality: uni and multivariable linear regression according to the percentage of dysmorphic oocytes respect to the total number of retrieved oocytes per patient.

| Characteristic             | Patients at risk | Univariable analysis |       |         | Multivariable analysis |       |              |
|----------------------------|------------------|----------------------|-------|---------|------------------------|-------|--------------|
|                            |                  | Coefficient (SE)     | t     | p value | Coefficient (SE)       | t     | p value      |
| Breast cancer              | 294              | 4.37 (1.79)          | 2.44  | 0.015   | 5.66 (2.22)            | 2.55  | <b>0.011</b> |
| Age                        | 294              | -0.53 (0.25)         | -2.11 | 0.035   | -0.32 (0.26)           | -1.23 | 0.221        |
| BMI                        | 270              | 0.25 (0.26)          | 0.96  | 0.336   | 0.11 (0.23)            | 0.46  | 0.646        |
| AMH                        | 248              | -0.05 (0.36)         | -0.13 | 0.900   | -0.18 (0.37)           | -0.48 | 0.633        |
| Duration of stimulation    | 292              | 0.43 (0.44)          | 0.97  | 0.335   | -0.06 (0.48)           | -0.13 | 0.896        |
| E2 level at triggering day | 292              | 0 (0)                | 0.12  | 0.904   | 0 (0)                  | 1.22  | 0.225        |
| Total FSH cumulative dose  | 292              | 0 (0)                | 1.54  | 0.124   | 0 (0)                  | 0.54  | 0.588        |

Bold font highlights statistically significant difference. SE: Standard Error. BMI: Body Mass Index. AMH: Anti-Mullerian Hormone. E2: Estradiol. FSH: Follicle Stimulating Hormone.
